# Supplementary material
Source: publisher figshare collection journal article supplement (https://adisjournals.figshare.com/ndownloader/files/37532326)
Supplement: Supplementary file 1 [file 37532326]

**Educational and emotional needs of patients with myelodysplastic syndromes:**  
**An AI analysis of multi-country social media**  
Pauline P. Frank, Mabel X.E. Lu, and Emma C. Sasse

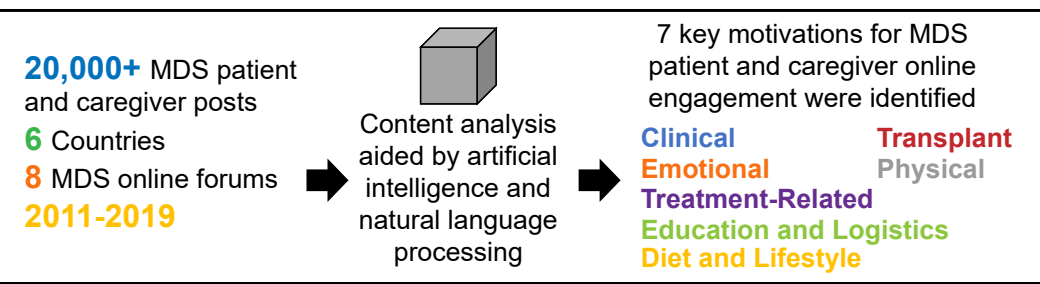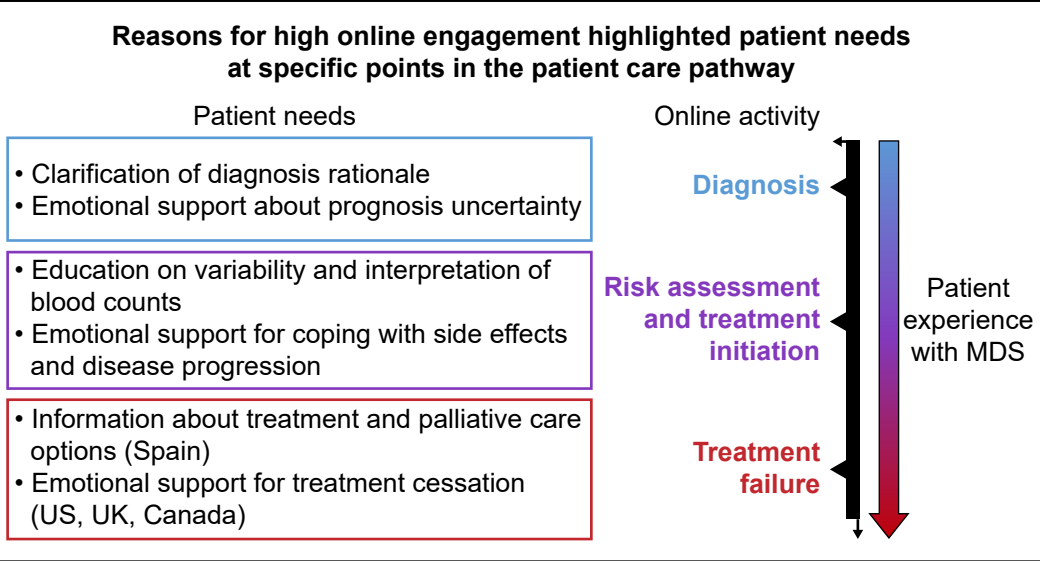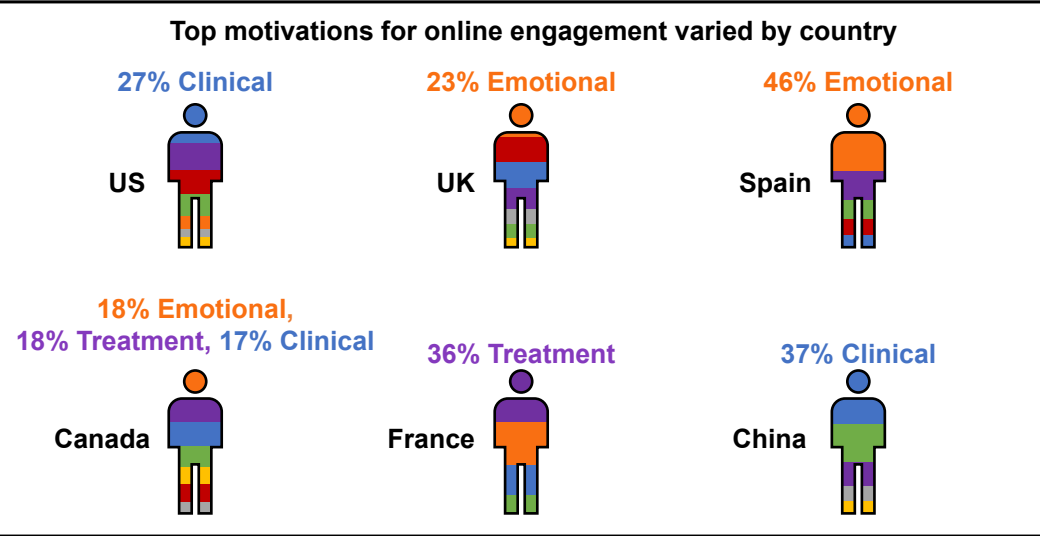

The graphical abstract represents the opinions of the authors. For a full list of declarations, including funding and author disclosure statements, please see the full text online. © The authors, CC BY-NC [2022].
